# Supplementary material for: Chemical Elicitor-Induced Modulation of Antioxidant Metabolism and Enhancement of Secondary Metabolite Accumulation in Cell Suspension Cultures of Scrophularia kakudensis Franch
Source: MDPI journal article supplement (doi:10.3390/ijms17030399), 2016-03-18
Supplement: s1 [file s1]

# Supplementary Materials: Chemical Elicitor-Induced Modulation of Antioxidant Metabolism and Enhancement of Secondary Metabolite Accumulation in Cell Suspension Cultures of *Scrophularia kakudensis* Franch

Abinaya Manivannan, Prabhakaran Soundararajan, Yoo Gyeong Park and Byoung Ryong Jeong

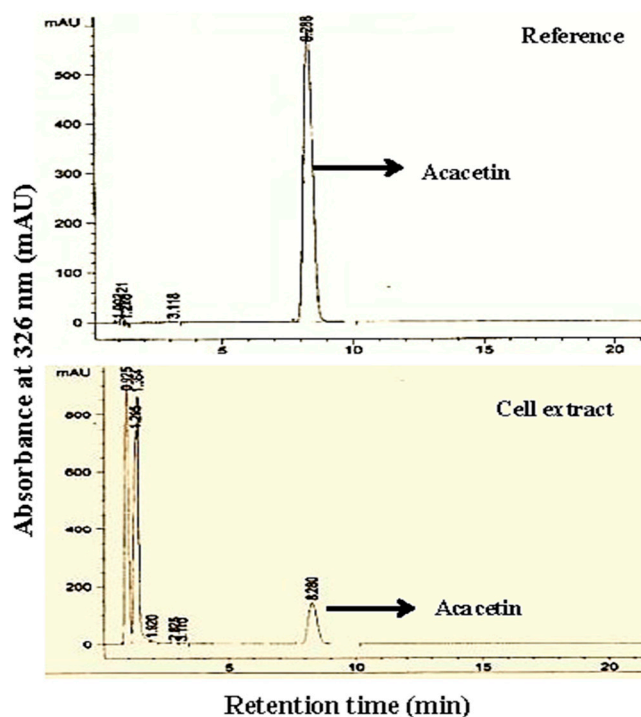

**Figure S1.** HPLC chromatograms of acacetin—reference and cell extract along with the LOD and LOQ values. Limit of detection (LOD) = 0.19  $\mu\text{g}\cdot\text{mg}^{-1}$ ; Limit of quantitation (LOQ) = 0.65  $\mu\text{g}\cdot\text{mg}^{-1}$ .
